# Supplementary material
Source: HighWire-hosted journal article supplement (https://jhr.uwpress.org/content/suppl/2025/05/12/jhr.0324-13477R1)
Supplement: 0324-13477R1_supp.pdf [file 0324-13477R1_supp.pdf]

**ONLINE APPENDIX**

**Sexual Orientation and Multiple Job Holding:  
Evidence from Swedish Administrative Data**

Christopher S. Carpenter, Erwan Dujecourt, Samuel Mann, and Lucia Naldi\*

February 2025

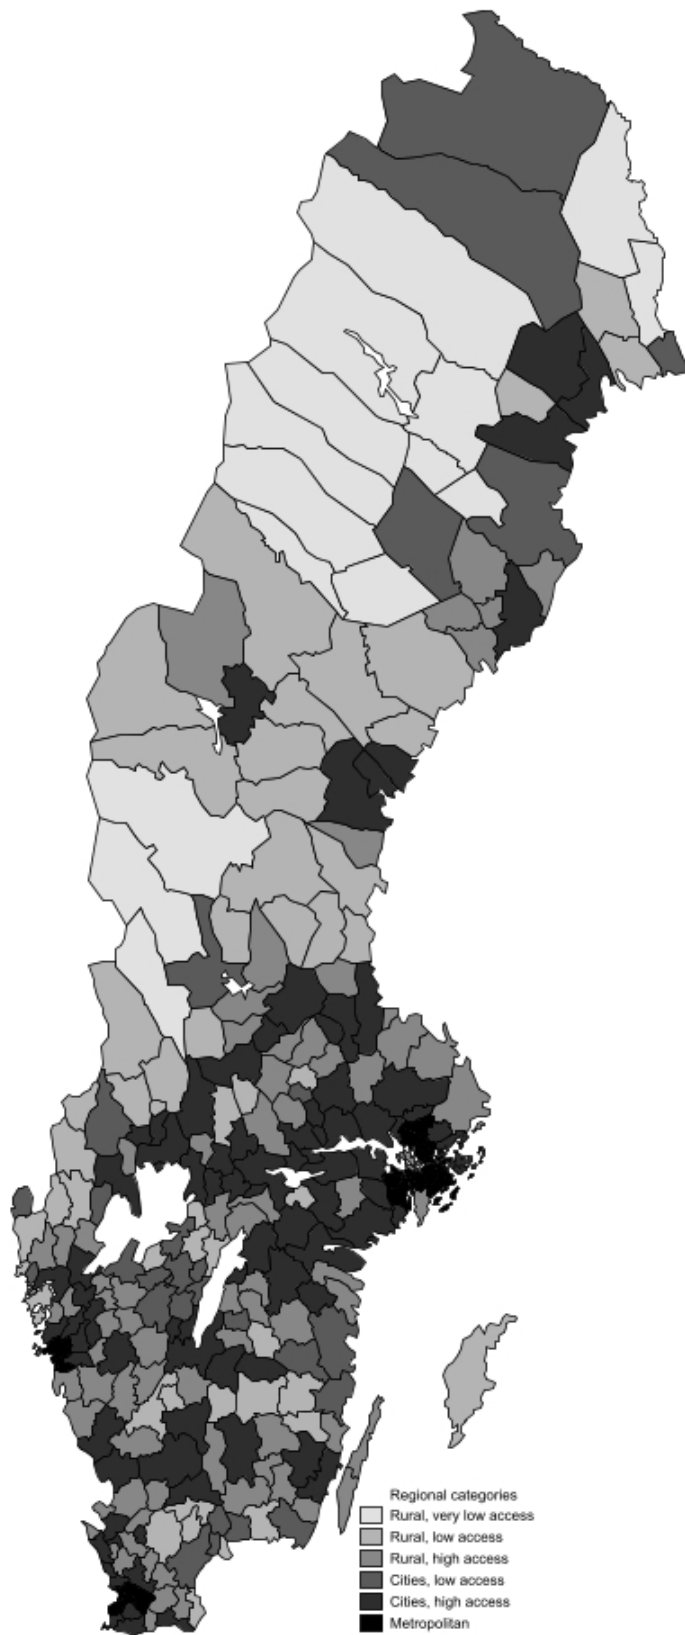

**Appendix Figure A1: Population Areas in Sweden**

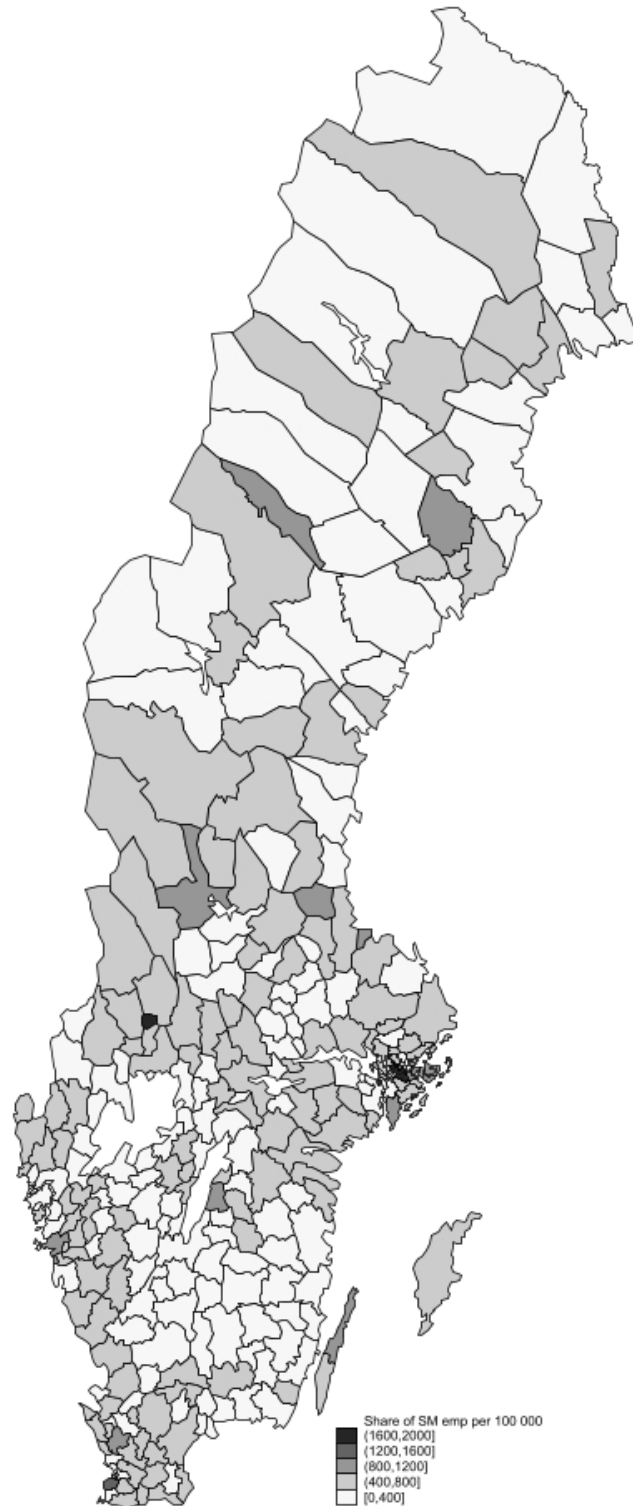

**Appendix Figure A2: Share of Sexual Minority Employees (per 100,000) of the Total Employed Population, by Municipalities in 2021**

Notes: This figure shows the share of sexual minority employees relative to all 18-65 employees by municipality. The individuals whom we do not know sexual orientation are excluded from this sample.

**Appendix Figure A3: The Role of Macroeconomic Uncertainty in Explaining the Higher Likelihood of Multiple Job Holding Among Sexual Minority Individuals**

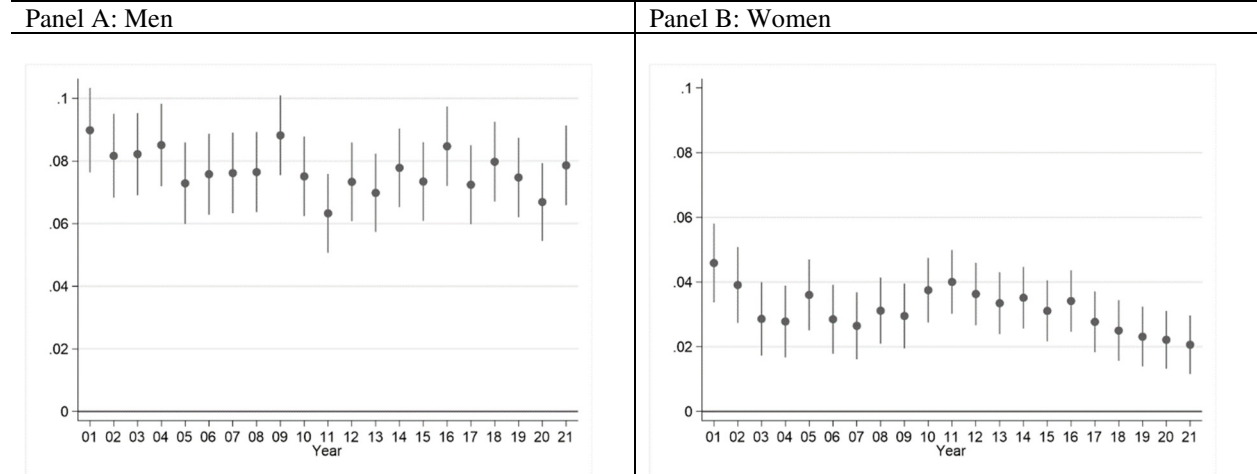

See Table 2. Each legend refers to a unique specification. Specifications are based on Column 4 of Table 2. The bars represent 95% confidence intervals.

**Appendix Table A1: Detailed Description of Data and Variables**

| Variables                                                        | Description                                                                                                                                                                                                                                                                                                                                                           |
|------------------------------------------------------------------|-----------------------------------------------------------------------------------------------------------------------------------------------------------------------------------------------------------------------------------------------------------------------------------------------------------------------------------------------------------------------|
| Multiple job holding                                             | Dummy variable that takes the value 1 if the individual has at least 2 employers, and 0 otherwise.                                                                                                                                                                                                                                                                    |
| Primary and secondary jobs                                       | Primary job is the position that generates the highest labor income and the secondary job is the one with the second highest labor income.                                                                                                                                                                                                                            |
| Ever-in same-sex legal union                                     | Dummy variable that takes the value 1 if the individual has ever been in a same-sex legal union, and 0 otherwise.                                                                                                                                                                                                                                                     |
| Age                                                              | Continuous variable that is equal to the individual age.                                                                                                                                                                                                                                                                                                              |
| Childbearing                                                     | Dummy variable that takes the value 1 if the individual has at least one child under 18 years old, and 0 otherwise.                                                                                                                                                                                                                                                   |
| Currently in legal union                                         | Dummy variable that takes the value 1 if the individual is in legal union (married or in a registered partnership) at year t, and 0 otherwise.                                                                                                                                                                                                                        |
| Divorced already                                                 | Dummy variable that takes the value 1 if the individual has previously separated from a legal union (divorced or separated from registered partnership), and 0 otherwise.                                                                                                                                                                                             |
| Educational categories                                           | Categorical variable that takes the value:                                                                                                                                                                                                                                                                                                                            |
| Less than primary education                                      | Dummy variable that takes the value 1 if the individual's highest educational achievement is less than primary education, and 0 otherwise.                                                                                                                                                                                                                            |
| Primary education                                                | Dummy variable that takes the value 1 if the individual's highest educational achievement is primary education, and 0 otherwise.                                                                                                                                                                                                                                      |
| Uncompleted secondary school education                           | Dummy variable that takes the value 1 if the individual's highest educational achievement is secondary education (less than 2 years), and 0 otherwise.                                                                                                                                                                                                                |
| Completed secondary education                                    | Dummy variable that takes the value 1 if the individual's highest educational achievement is secondary education (3 years), and 0 otherwise.                                                                                                                                                                                                                          |
| More than secondary education, but less than a bachelor's degree | Dummy variable that takes the value 1 if the individual's highest educational achievement is more than secondary education (less than 2 years), and 0 otherwise.                                                                                                                                                                                                      |
| Bachelor's degree                                                | Dummy variable that takes the value 1 if the individual's highest educational achievement is bachelor level, and 0 otherwise.                                                                                                                                                                                                                                         |
| Advanced degree                                                  | Dummy variable that takes the value 1 if the individual's highest educational achievement is doctoral or licentiate, and 0 otherwise.                                                                                                                                                                                                                                 |
| Other/unknown education                                          | Dummy variable that takes the value 1 if the individual's highest educational achievement is unknown, and 0 otherwise.                                                                                                                                                                                                                                                |
| Firms                                                            | Variable indicating the identification number of all firms.                                                                                                                                                                                                                                                                                                           |
| Firm size                                                        | Variable indicating the number of employees.                                                                                                                                                                                                                                                                                                                          |
| Immigration background                                           | Dummy variable that takes the value 1 if the individual is not born in Sweden or the individual's two parents are immigrants, and 0 otherwise.                                                                                                                                                                                                                        |
| Industry two-digits                                              | Categorical variable that classifies worker's firms into 87 distinct categories based on their respective industries (e.g., accommodation; food beverage service activities; retail; wholesale trade, except from motor vehicles and motorcycles; education; creative, arts and entertainment activities; sports activities and amusement and recreation activities). |
| Industry one-digit: Agriculture                                  | Dummy variable that takes the value 1 if the individual is mainly working in the agricultural industry, and 0 otherwise.                                                                                                                                                                                                                                              |
| Construction                                                     | Dummy variable that takes the value 1 if the individual is mainly working in the construction industry, and 0 otherwise.                                                                                                                                                                                                                                              |
| Healthcare                                                       | Dummy variable that takes the value 1 if the individual is mainly working in the healthcare industry, and 0 otherwise.                                                                                                                                                                                                                                                |
| Manufacturing                                                    | Dummy variable that takes the value 1 if the individual is mainly working in the manufacturing industry, and 0 otherwise.                                                                                                                                                                                                                                             |
| Public sectors and administration                                | Dummy variable that takes the value 1 if the individual is mainly working in the public sector or administration sector, and 0 otherwise.                                                                                                                                                                                                                             |

*Sexual Orientation and Multiple Job Holding*

|                                   |                                                                                                                                                                                                                                                                                                                                                                                                                                                                                                                                                                                                                                                                                                                                                                 |
|-----------------------------------|-----------------------------------------------------------------------------------------------------------------------------------------------------------------------------------------------------------------------------------------------------------------------------------------------------------------------------------------------------------------------------------------------------------------------------------------------------------------------------------------------------------------------------------------------------------------------------------------------------------------------------------------------------------------------------------------------------------------------------------------------------------------|
| Service                           | Dummy variable that takes the value 1 if the individual is mainly working in the service industry, and 0 otherwise.                                                                                                                                                                                                                                                                                                                                                                                                                                                                                                                                                                                                                                             |
| Other sectors                     | Dummy variable that takes the value 1 if the individual is mainly not working in the agricultural, construction, healthcare, manufacturing, public administration, service industry, and 0 otherwise.                                                                                                                                                                                                                                                                                                                                                                                                                                                                                                                                                           |
| Occupation                        | Categorical variable of the worker's occupation (e.g., legislators, chief executives, senior government officials, managers, high-skilled workers, clerks, technicians, armed forces).                                                                                                                                                                                                                                                                                                                                                                                                                                                                                                                                                                          |
| Municipality population           | Continuous variable representing the adult municipality population in which the individual is living.                                                                                                                                                                                                                                                                                                                                                                                                                                                                                                                                                                                                                                                           |
| Regional category<br>Metropolitan | Categorical variable that takes the value:<br>Dummy variable that takes the value 1 if located in municipalities with less than 20% of their population in rural areas and a total population of at least 500,000 in adjacent municipalities.                                                                                                                                                                                                                                                                                                                                                                                                                                                                                                                   |
| Cities with high access           | Dummy variable that takes the value 1 if located in other municipalities outside metropolitan with less than 50% of their population in rural areas and at least 50% of their population having less than a 45-minute journey to an agglomeration with at least 50,000 inhabitants.                                                                                                                                                                                                                                                                                                                                                                                                                                                                             |
| Rural areas with high access      | Dummy variable that takes the value 1 if located in municipalities with at least 50% of their population in rural areas and at least 50% of their population having less than a 45-minute journey to an agglomeration with at least 50,000 inhabitants.                                                                                                                                                                                                                                                                                                                                                                                                                                                                                                         |
| Rural areas with low access       | Dummy variable that takes the value 1 if located in municipalities with at least 50% of their population in rural areas and less than 50% of their population having less than a 45-minute journey to an agglomeration with at least 50,000 inhabitants.                                                                                                                                                                                                                                                                                                                                                                                                                                                                                                        |
| Rural areas with very low access  | Dummy variable that takes the value 1 if located in a municipalities with their entire population in rural areas and with at least an average 90-minute journey to an agglomeration with at least 50,000 inhabitants.                                                                                                                                                                                                                                                                                                                                                                                                                                                                                                                                           |
| Net wealth                        | Continuous variable: total market value net wealth of the individual is the sum of the total market value financial assets (bank account balance; interest, mixed and equity funds; shares, quoted options; bonds; domestic and foreign endowment insurance; and securities) and the sum of real estate assets (houses, agricultural, industrial, domestic, foreign, land properties) of the individual minus the total market value debt (mortgage, individual, and student debt) of the individual. The variable is denominated in SEK. The wealth variable exists from 1999 and was discontinued after the wealth tax repeal in 2007, as financial institutions were no longer obliged to report individuals' assets and liabilities to the tax authorities. |

**Appendix Table A2: Gender Differences in Labor Market Outcomes in Sweden for Individuals Aged 18-65**

|                                               | (1)<br><b>Women</b> | (2)<br><b>Men</b> |
|-----------------------------------------------|---------------------|-------------------|
| <b>Full population</b>                        |                     |                   |
| Employed                                      | 0.798               | 0.775             |
| Number of unique individuals                  | 4,430,224           | 4,657,432         |
| <b>Employed population</b>                    |                     |                   |
| Has multiple jobs in a year                   | 0.274               | 0.274             |
| Average annual labor income in SEK (1€~10SEK) | 241,843             | 322,114           |
| Firm size                                     | 9,989               | 5,128             |
| Agricultural                                  | 0.005               | 0.013             |
| Manufacturing                                 | 0.068               | 0.196             |
| Construction                                  | 0.010               | 0.103             |
| Service                                       | 0.325               | 0.430             |
| Healthcare                                    | 0.286               | 0.080             |
| Administration and public sectors             | 0.263               | 0.124             |
| Other sectors                                 | 0.043               | 0.054             |
| Number of unique individuals                  | 3,867,030           | 4,110,976         |

Author calculations from Sweden population register from 2001 to 2021.

**Appendix Table A3: Sexual Minority Status and Likelihood of Multiple Job Holding, Expanded Set of Coefficient Estimates from Table 2**

|                                                                  | (1)<br><b>Women</b>  | (2)<br><b>Men</b>    |
|------------------------------------------------------------------|----------------------|----------------------|
| Ever in a legal same-sex union                                   | 0.030***<br>(0.001)  | 0.076***<br>(0.001)  |
| Age                                                              | -0.014***<br>(0.000) | -0.015***<br>(0.000) |
| Age <sup>2</sup>                                                 | 0.000***<br>(0.000)  | 0.000***<br>(0.000)  |
| Immigration background                                           | 0.001***<br>(0.000)  | 0.016***<br>(0.000)  |
| Currently in legal union                                         | -0.037***<br>(0.000) | -0.003***<br>(0.000) |
| Childbearing                                                     | -0.040***<br>(0.000) | -0.014***<br>(0.000) |
| Less than primary education                                      | -0.019***<br>(0.000) | -0.035***<br>(0.000) |
| Primary education                                                | -0.012***<br>(0.000) | -0.016***<br>(0.000) |
| Completed secondary education                                    | 0.022***<br>(0.000)  | 0.004***<br>(0.000)  |
| More than secondary education, but less than a bachelor's degree | 0.032***<br>(0.000)  | 0.013***<br>(0.000)  |
| Bachelor's degree                                                | 0.035***<br>(0.000)  | 0.036***<br>(0.000)  |
| Advanced degree                                                  | 0.183***<br>(0.001)  | 0.168***<br>(0.001)  |
| Other/unknown education                                          | -0.087***<br>(0.001) | -0.097***<br>(0.001) |
| Already divorced                                                 | 0.044***<br>(0.000)  | 0.037***<br>(0.000)  |
| Population, municipality (ln)                                    | 0.001***<br>(0.000)  | 0.004***<br>(0.000)  |
| Cities, high access                                              | -0.021***<br>(0.000) | -0.007***<br>(0.000) |
| Cities, low access                                               | -0.029***<br>(0.000) | -0.004***<br>(0.000) |
| Rural, high access                                               | -0.004***<br>(0.000) | 0.001**<br>(0.000)   |
| Rural, low access                                                | -0.011***<br>(0.000) | 0.013***<br>(0.000)  |
| Rural, very low access                                           | 0.040***<br>(0.001)  | 0.099***<br>(0.001)  |
| Sample mean                                                      | 0.244                | 0.261                |
| R-squared                                                        | 0.039                | 0.023                |
| Number of individual-year observations                           | 29,200,973           | 27,228,038           |
| Year fixed effects?                                              | X                    | X                    |
| Demographic characteristics?                                     | X                    | X                    |
| Geographic characteristics?                                      | X                    | X                    |

Notes: Robust standard errors in parentheses. \*\*\* p<0.01, \*\* p<0.05, \* p<0.1. Author calculations from Sweden population register linked to Sweden business register. Education base: uncompleted secondary school education. Regional category base: metropolitan.

**Appendix Table A4: Sensitivity of Our Main Results on Multiple Job Holding to Controlling for Children and Age**

|                                                                | (1)<br><b>All Demographics<br/>(Table 2, Column 4,<br/>Baseline<br/>Specification)</b> | (2)<br><b>Without<br/>Childbearing Control</b> | (3)<br><b>Without Age<br/>Controls</b> |
|----------------------------------------------------------------|----------------------------------------------------------------------------------------|------------------------------------------------|----------------------------------------|
| <b>Women</b>                                                   |                                                                                        |                                                |                                        |
| Ever in a same-sex legal union                                 | 0.030***<br>(0.001)                                                                    | 0.040***<br>(0.001)                            | 0.062***<br>(0.001)                    |
| Sample mean                                                    | 0.244                                                                                  | 0.244                                          | 0.244                                  |
| Adj-R-squared                                                  | 0.039                                                                                  | 0.038                                          | 0.023                                  |
| Number of individual-year observations                         | 29,200,973                                                                             | 29,200,973                                     | 29,200,973                             |
| <b>Men</b>                                                     |                                                                                        |                                                |                                        |
| Ever in a same-sex legal union                                 | 0.076***<br>(0.001)                                                                    | 0.081***<br>(0.001)                            | 0.078***<br>(0.001)                    |
| Sample mean                                                    | 0.261                                                                                  | 0.261                                          | 0.261                                  |
| Adj-R-squared                                                  | 0.023                                                                                  | 0.022                                          | 0.013                                  |
| Number of individual-year observations                         | 27,228,038                                                                             | 27,228,038                                     | 27,228,038                             |
| Year fixed effects?                                            | X                                                                                      | X                                              | X                                      |
| Age controls?                                                  | X                                                                                      | X                                              |                                        |
| Childbearing control?                                          | X                                                                                      |                                                | X                                      |
| Education, immigration background and marital status controls? | X                                                                                      | X                                              | X                                      |
| Geographic characteristics?                                    | X                                                                                      | X                                              | X                                      |

Notes: Model includes all controls as in Column 4 of Table 2. See notes to Table 2 in the main text. Robust standard errors in parentheses. \*\*\* p<0.01, \*\* p<0.05, \* p<0.1. Author calculations from Sweden population register linked to Sweden business register. Education base: uncompleted secondary school education. Regional category base: metropolitan.

**Appendix Table A5: Estimates from a Pooled Model**

|                                                                  | (1)<br><b>Multiple Job Holder</b> |
|------------------------------------------------------------------|-----------------------------------|
| Excluded category: Men exclusively in different-sex legal unions | ---                               |
| Men ever in a same-sex legal union                               | 0.065***<br>(0.001)               |
| Women exclusively in different-sex legal unions                  | -0.022***<br>(0.000)              |
| Women ever in a same-sex legal union                             | 0.022***<br>(0.001)               |
| Sample mean                                                      | 0.252                             |
| Adj-R-squared                                                    | 0.030                             |
| Number of individual-year observations                           | 56,429,011                        |
| Year fixed effects?                                              | X                                 |
| Demographic characteristics?                                     | X                                 |
| Geographic characteristics?                                      | X                                 |

Notes: Model includes all controls as in Column 4 of Table 2. See notes to Table 2 in the main text. Robust standard errors in parentheses. \*\*\* p<0.01, \*\* p<0.05, \* p<0.1. Author calculations from Sweden population register linked to Sweden business register. Education base: uncompleted secondary school education. Regional category base: metropolitan.

**Appendix Table A6: Results are Robust to Dropping Individuals Ever Observed in Both Same-Sex and Different-Sex Legal Unions**

|                                              | (1)<br>Main Sample,<br>Women | (2)<br>Dropping 1,165<br>Women Ever in<br>Both Same-Sex<br>and Different-Sex<br>Legal Unions | (3)<br>Main Sample,<br>Men | (4)<br>Dropping 427 Men<br>Ever in Both<br>Same-Sex and<br>Different-Sex<br>Legal Unions |
|----------------------------------------------|------------------------------|----------------------------------------------------------------------------------------------|----------------------------|------------------------------------------------------------------------------------------|
| Ever in a same-sex<br>legal union            | 0.030***<br>(0.001)          | 0.030***<br>(0.001)                                                                          | 0.076***<br>(0.001)        | 0.074***<br>(0.001)                                                                      |
| Sample mean                                  | 0.244                        | 0.244                                                                                        | 0.261                      | 0.261                                                                                    |
| Adj-R-squared                                | 0.039                        | 0.039                                                                                        | 0.023                      | 0.023                                                                                    |
| Number of<br>individual-year<br>observations | 29,200,973                   | 29,181,311                                                                                   | 27,228,038                 | 27,221,574                                                                               |
| Year fixed effects?                          | X                            | X                                                                                            | X                          | X                                                                                        |
| Demographic<br>characteristics?              | X                            | X                                                                                            | X                          | X                                                                                        |
| Geographic<br>characteristics?               | X                            | X                                                                                            | X                          | X                                                                                        |

Notes: Model includes all controls as in Column 4 of Table 2. See notes to Table 2 in the main text. Robust standard errors in parentheses. \*\*\* p<0.01, \*\* p<0.05, \* p<0.1. Author calculations from Sweden population register linked to Sweden business register. Education base: uncompleted secondary school education. Regional category base: metropolitan.

**Appendix Table A7: The Role of Individual Factors Related to Self-Insurance in Explaining the Higher Likelihood of Multiple Job Holding Among Sexual Minority Individuals**

|                                        | (1)<br>Below Median<br>Income (all jobs) | (2)<br>Above or Equal<br>Median Income<br>(all jobs) | (3)<br>Below Median<br>Wealth | (4)<br>Above or Equal<br>Median Wealth |
|----------------------------------------|------------------------------------------|------------------------------------------------------|-------------------------------|----------------------------------------|
| Women                                  |                                          |                                                      |                               |                                        |
| Ever in a legal same-sex union         | 0.034***<br>(0.002)                      | 0.026***<br>(0.002)                                  | 0.021***<br>(0.003)           | 0.057***<br>(0.004)                    |
| Sample mean                            | 0.247                                    | 0.241                                                | 0.292                         | 0.212                                  |
| Adj-R-squared                          | 0.064                                    | 0.022                                                | 0.057                         | 0.033                                  |
| Number of individual-year observations | 14,595,606                               | 14,605,367                                           | 5,173,447                     | 5,173,470                              |
| Men                                    |                                          |                                                      |                               |                                        |
| Ever in a legal same-sex union         | 0.057***<br>(0.002)                      | 0.097***<br>(0.002)                                  | 0.070***<br>(0.003)           | 0.092***<br>(0.004)                    |
| Sample mean                            | 0.271                                    | 0.252                                                | 0.313                         | 0.243                                  |
| Adj-R-squared                          | 0.033                                    | 0.014                                                | 0.023                         | 0.022                                  |
| Number of individual-year observations | 13,610,086                               | 13,617,952                                           | 4,983,392                     | 4,983,398                              |
| Year fixed effects?                    | X                                        | X                                                    | X                             | X                                      |
| Demographic characteristics?           | X                                        | X                                                    | X                             | X                                      |
| Geographic characteristics?            | X                                        | X                                                    | X                             | X                                      |

Notes: Robust standard errors in parentheses. \*\*\* p<0.01, \*\* p<0.05, \* p<0.1. Author calculations from Sweden population register linked to Sweden business register. Education base: uncompleted secondary school education. Regional category base: metropolitan.

**Appendix Table A8: Heterogeneity in Main Results on Multiple Job Holding by Income on the Primary Job**

|                                              | (1)<br>Full Sample  | (2)<br>Lowest 25%<br>Labor Income,<br>Primary Job | (3)<br>25-50% Labor<br>Income Range,<br>Primary Job | (4)<br>50-75% Labor<br>Income Range,<br>Primary Job | (5)<br>>75% Top<br>25% Labor<br>Income,<br>Primary Job |
|----------------------------------------------|---------------------|---------------------------------------------------|-----------------------------------------------------|-----------------------------------------------------|--------------------------------------------------------|
| Women<br>Ever in a same-sex<br>legal union   | 0.030***<br>(0.001) | 0.032***<br>(0.002)                               | 0.034***<br>(0.002)                                 | 0.016***<br>(0.002)                                 | 0.032***<br>(0.002)                                    |
| Sample mean                                  | 0.244               | 0.340                                             | 0.275                                               | 0.181                                               | 0.180                                                  |
| Adj-R-squared                                | 0.039               | 0.056                                             | 0.052                                               | 0.022                                               | 0.017                                                  |
| Number of<br>individual-year<br>observations | 29,200,973          | 7,302,793                                         | 7,302,827                                           | 7,298,866                                           | 7,296,487                                              |
| Men<br>Ever in a same-sex<br>legal union     | 0.076***<br>(0.001) | 0.039***<br>(0.003)                               | 0.040***<br>(0.003)                                 | 0.068***<br>(0.003)                                 | 0.086***<br>(0.003)                                    |
| Sample mean                                  | 0.261               | 0.408                                             | 0.267                                               | 0.187                                               | 0.183                                                  |
| Adj-R-squared                                | 0.023               | 0.041                                             | 0.023                                               | 0.016                                               | 0.029                                                  |
| Number of<br>individual-year<br>observations | 27,228,038          | 6,810,324                                         | 6,807,846                                           | 6,805,856                                           | 6,804,012                                              |
| Year fixed effects?                          | X                   | X                                                 | X                                                   | X                                                   | X                                                      |
| Demographic<br>characteristics?              | X                   | X                                                 | X                                                   | X                                                   | X                                                      |
| Geographic<br>characteristics?               | X                   | X                                                 | X                                                   | X                                                   | X                                                      |

Notes: Model includes all controls as in Column 4 of Table 2. See notes to Table 2 in the main text. Robust standard errors in parentheses. \*\*\* p<0.01, \*\* p<0.05, \* p<0.1. Author calculations from Sweden population register linked to Sweden business register. Education base: uncompleted secondary school education. Regional category base: metropolitan.

**Appendix Table A9: Exploring Heterogeneity by Whether a Service Sector Job is the Primary Job Among Multiple Job Holders**

|                                              | (1)<br><b>Primary Working<br/>Position in the<br/>Service Sector,<br/>Women</b> | (2)<br><b>Secondary<br/>Working Position<br/>is in the Service<br/>Sector, Women</b> | (3)<br><b>Primary Working<br/>Position in the<br/>Service Sector,<br/>Men</b> | (4)<br><b>Secondary<br/>Working Position<br/>is in the Service<br/>Sector, Men</b> |
|----------------------------------------------|---------------------------------------------------------------------------------|--------------------------------------------------------------------------------------|-------------------------------------------------------------------------------|------------------------------------------------------------------------------------|
| Ever in a same-sex<br>legal union            | -0.064***<br>(0.002)                                                            | -0.062***<br>(0.002)                                                                 | -0.067***<br>(0.002)                                                          | -0.066***<br>(0.002)                                                               |
| Sample mean                                  | 0.337                                                                           | 0.351                                                                                | 0.435                                                                         | 0.410                                                                              |
| Adj-R-squared                                | 0.071                                                                           | 0.051                                                                                | 0.054                                                                         | 0.050                                                                              |
| Number of<br>individual-year<br>observations | 7,129,982                                                                       | 7,129,982                                                                            | 7,112,843                                                                     | 7,112,843                                                                          |
| Year fixed effects?                          | X                                                                               | X                                                                                    | X                                                                             | X                                                                                  |
| Demographic<br>characteristics?              | X                                                                               | X                                                                                    | X                                                                             | X                                                                                  |
| Geographic<br>characteristics?               | X                                                                               | X                                                                                    | X                                                                             | X                                                                                  |

Notes: Model includes all controls as in Column 4 of Table 2. See notes to Table 2 in the main text. Robust standard errors in parentheses. \*\*\* p<0.01, \*\* p<0.05, \* p<0.1. Author calculations from Sweden population register linked to Sweden business register. Education base: uncompleted secondary school education. Regional category base: metropolitan.
